# Supplementary material
Source: PubMed Central journal article supplement (PMC2917860)
Supplement: supp_mol.110.064451_Suppl_Figure1.pdf [file supp_mol.110.064451_Suppl_Figure1.pdf]

**TITLE:** Methyl 2-Cyano-3,12-dioxooleana-1,9-dien-28-oate (CDDO-Me) Decreases Specificity Protein (Sp) Transcription Factors and Inhibits Pancreatic Tumor Growth

**AUTHORS:** Indira Jutooru, Gayathri Chadalapaka, Maen Abdelrahim, Md Riyaz Basha, Ismael Samudio, Marina Konopleva, Michael Andreeff, and Stephen Safe

**JOURNAL:** *Molecular Pharmacology* (MOL #64451)

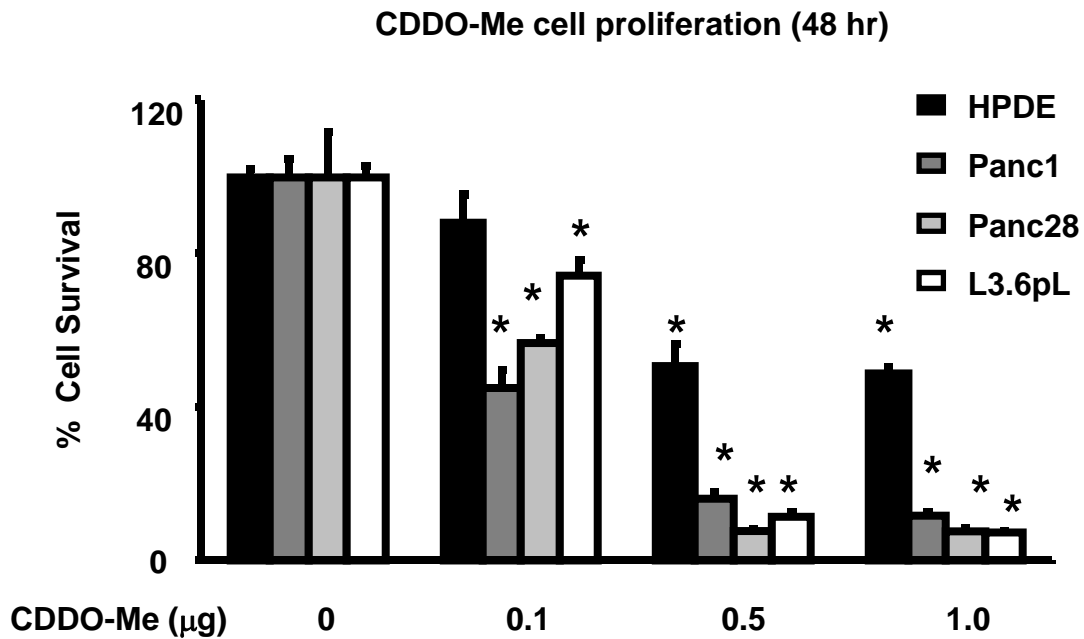

**Supplemental Figure 1.** Growth inhibitory effects of CDDO-Me. Panc1, Panc28, L3.6pL and HPDE (non-transformed) cells were treated with different concentrations of CDDO-Me for 48 hr, and cells were counted as described in the Materials and Methods. Results are expressed as means  $\pm$  SE for 3 replicate determinations for each treatment group, and significant ( $P < 0.05$ ) decreases in cell proliferation are indicated (\*).
