# Supplementary material
Source: PubMed Central journal article supplement (PMC2917860)
Supplement: supp_mol.110.064451_Suppl_Figure2.pdf [file supp_mol.110.064451_Suppl_Figure2.pdf]

**TITLE:** Methyl 2-Cyano-3,12-dioxooleana-1,9-dien-28-oate (CDDO-Me) Decreases Specificity Protein (Sp) Transcription Factors and Inhibits Pancreatic Tumor Growth

**AUTHORS:** Indira Jutooru, Gayathri Chadalapaka, Maen Abdelrahim, Md Riyaz Basha, Ismael Samudio, Marina Konopleva, Michael Andreeff, and Stephen Safe

**JOURNAL:** *Molecular Pharmacology* (MOL #64451)

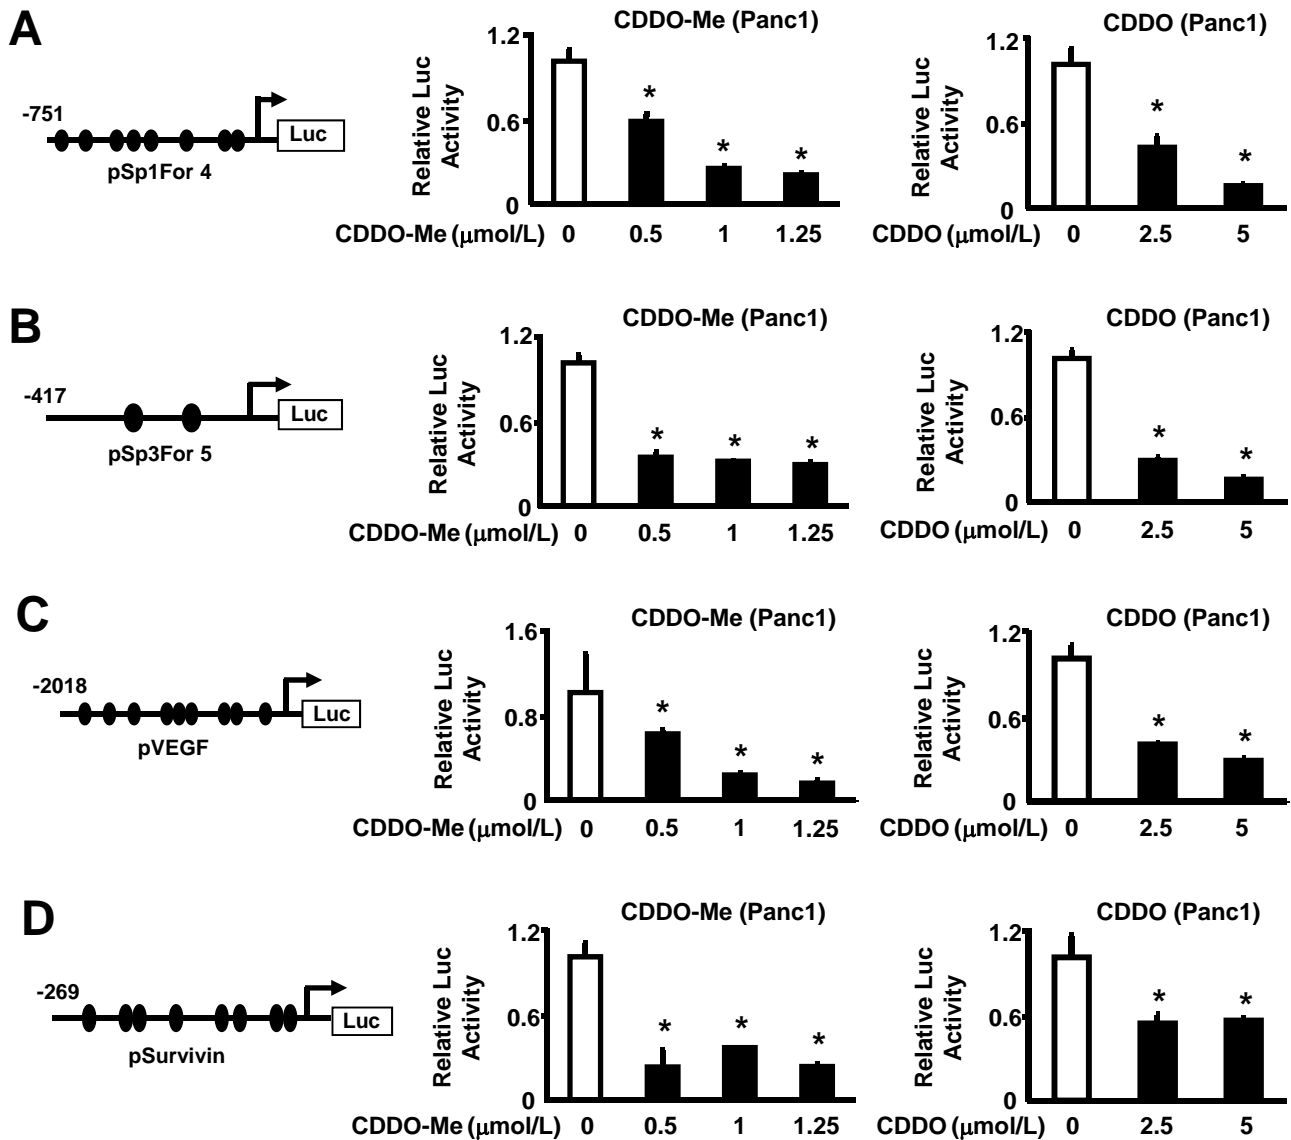

**Supplemental Figure 2.** CDDO and CDDO-Me decrease transactivation of Sp1, Sp3, VEGF and survivin promoter constructs. Panc1 cells were treated with DMSO (solvent control), CDDO-Me (0.5, 1.0 or 1.25  $\mu\text{mol/L}$ ), or CDDO (2.5 or 5.0  $\mu\text{mol/L}$ ) and effects on transactivation of promoters were determined after treatment for 24 hr as described in Materials and Methods. Results are expressed as means  $\pm$  SE for three replicate determinations for each treatment group, and significant ( $P < 0.05$ ) decreases in luciferase activity compared to the solvent (DMSO) control are indicated (\*).
