# Supplementary material
Source: PubMed Central journal article supplement (PMC2917860)
Supplement: supp_mol.110.064451_Suppl_Figure3.pdf [file supp_mol.110.064451_Suppl_Figure3.pdf]

**TITLE:** Methyl 2-Cyano-3,12-dioxooleana-1,9-dien-28-oate (CDDO-Me) Decreases Specificity Protein (Sp) Transcription Factors and Inhibits Pancreatic Tumor Growth

**AUTHORS:** Indira Jutooru, Gayathri Chadalapaka, Maen Abdelrahim, Md Riyaz Basha, Ismael Samudio, Marina Konopleva, Michael Andreeff, and Stephen Safe

**JOURNAL:** *Molecular Pharmacology* (MOL #64451)

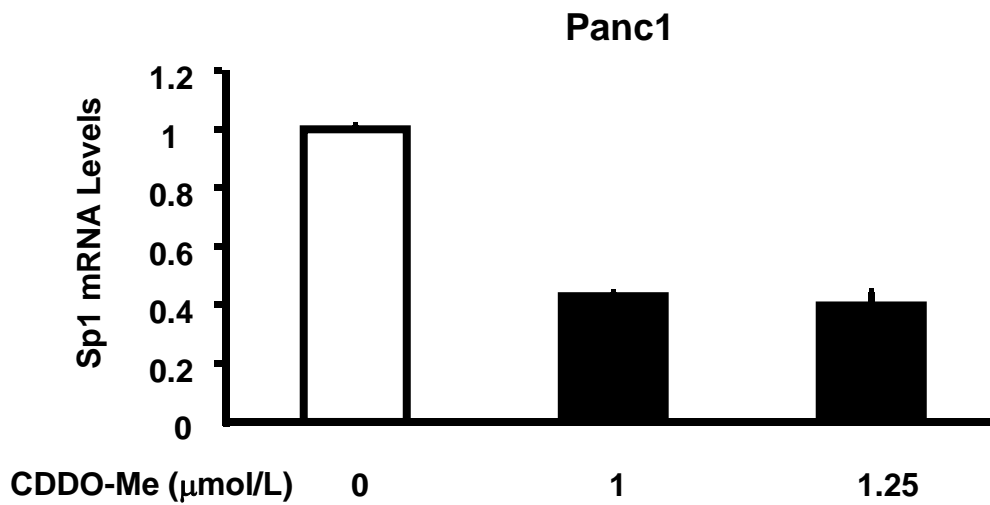

**Supplemental Figure 3.** Effect of CDDO-Me on Sp1 mRNA levels. Panc-1 cells were treated with DMSO or CDDO-Me (1.0 or 1.25  $\mu\text{mol/L}$ ) for 24 hr and Sp1 mRNA levels were analyzed using real time PCR as described in Materials and Methods.
